# Supplementary material for: Transesterification with CE15 glucuronoyl esterase from Cerrena unicolor reveals substrate preferences
Source: PubMed Central journal article supplement (PMC10787888; doi:10.1007/s10529-023-03456-x), 2023-12-27
Supplement: 10529_2023_3456_MOESM1_ESM.pdf [file 10529_2023_3456_MOESM1_ESM.pdf]

**Supplementary information for**

**Transesterification with CE15 glucuronoyl esterase from *Cerreña unicolor* reveals substrate preferences**

Biotechnology Letters

*Authors: Valentina Perna and Jane Wittrup Agger\**

Department of Biotechnology and Biomedicine

Technical University of Denmark

2800 Kgs Lyngby, Denmark

\*corresponding; jaag@dtu.dk

Table S1. **Results of control experiments of Me-4-O-MeGlcA and Me-GlcA hydrolysis by CuGE.** Me-4-O-MeGlcA hydrolysis was performed with 5.2  $\mu\text{g}/\text{mL}$  of CuGE while Me-GlcA hydrolysis was performed with 260  $\mu\text{g}/\text{mL}$  of CuGE.

| Reaction time | Me-4-O-MeGlcA<br>[mM] | MeGlcA<br>[mM]  |
|---------------|-----------------------|-----------------|
| 0             | $0.49 \pm 0.09$       | $0.53 \pm 0.01$ |
| 20            | $0.41 \pm 0.12$       | $0.38 \pm 0.01$ |
| 40            | $0.33 \pm 0.09$       | $0.31 \pm 0.03$ |
| 60            | $0.29 \pm 0.06$       | $0.23 \pm 0.09$ |
| 80            | $0.24 \pm 0.04$       | $0.17 \pm 0.06$ |
| 90            | $0.22 \pm 0.01$       | $0.09 \pm 0.03$ |

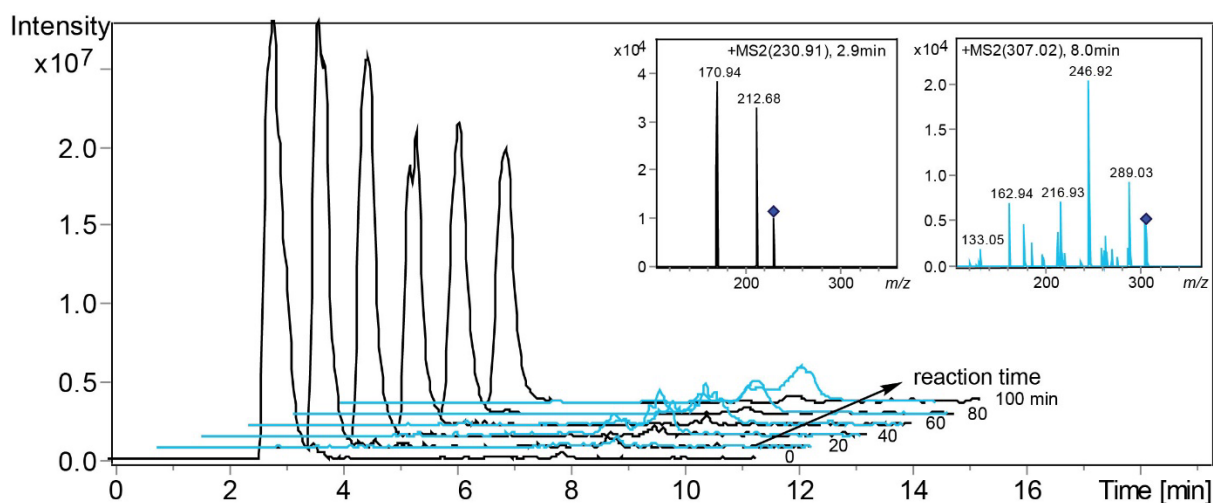

**Figure S1.** Reaction progression of the transesterification of BnzOH with Me-GlcA by 260  $\mu\text{g/mL}$  (4.3  $\mu\text{M}$ ) CuGE over 100 min. Extracted Ion Chromatogram (EIC) of Me-GlcA (black) at a retention time (RT) 2.9 min and  $m/z$  230.91 decreased intensity over reaction time. EIC of BnzGlcA (blue) at a RT 8.0 min and  $m/z$  307.02 increased intensity over reaction time. All ions are shown as  $[\text{M}+\text{Na}]^+$ . MS2 spectra of  $m/z$  230.91 and  $m/z$  307.02 are also shown.

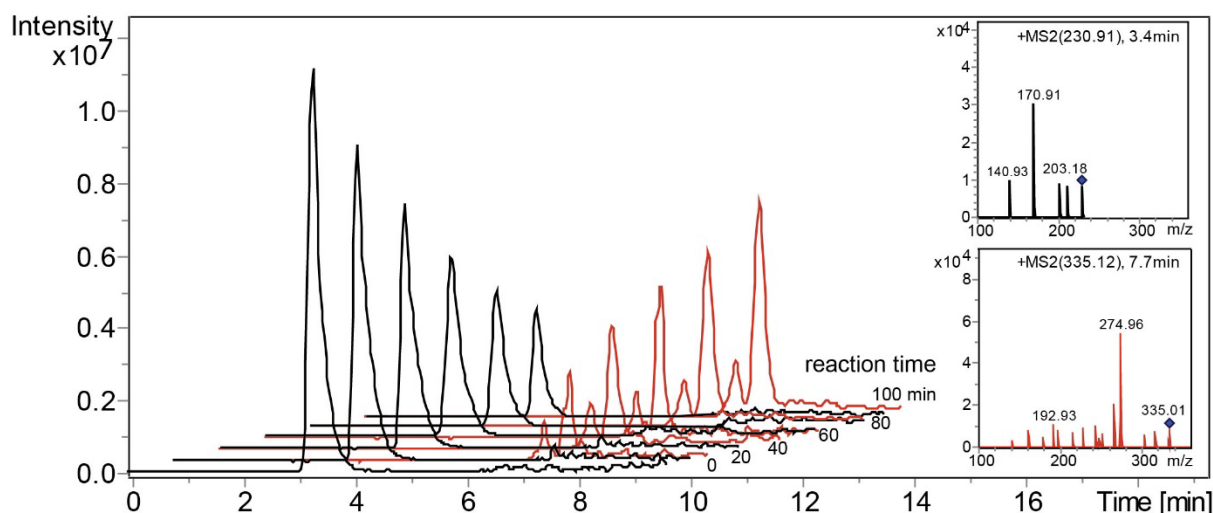

**Figure S2.** Reaction progression of the transesterification of PhPrOH with Me-GlcA by 52  $\mu\text{g/mL}$  (0.87  $\mu\text{M}$ ) CuGE over 100 min. EIC of Me-GlcA (black) at a retention time (RT) 3.4 min and  $m/z$  230.91 decreased intensity over reaction time. EIC of PhPr-GlcA (red) at a RT 7.7 min and  $m/z$  335.12 increased intensity over reaction time. All ions are shown as  $[\text{M}+\text{Na}]^+$ . MS2 spectra of  $m/z$  230.91 and  $m/z$  335.12 are also shown.  $m/z$  335.12 splits in two peaks (a minor shoulder in front of the main peak), which could be indicative for chirality, however not investigated further.

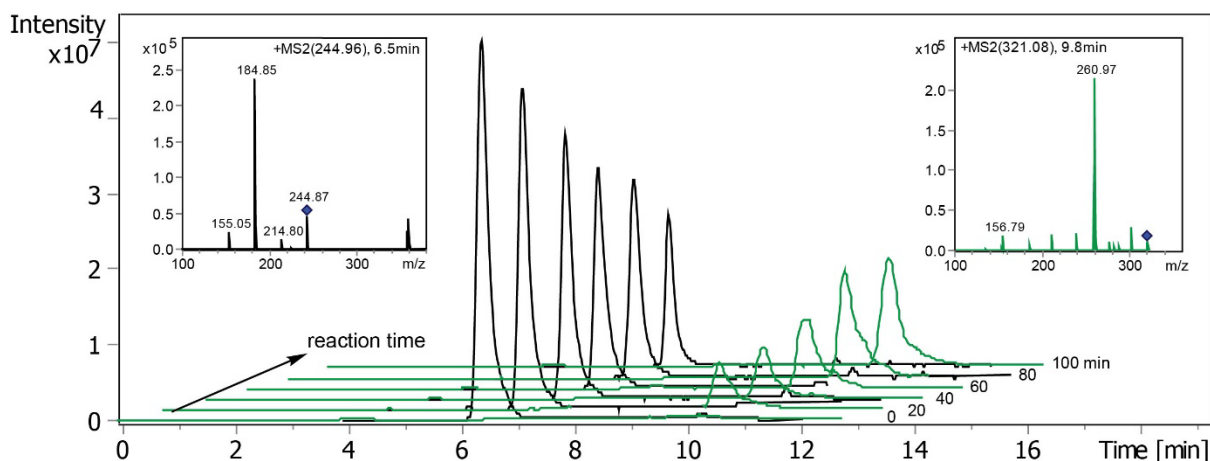

**Figure S3.** Reaction progression of the transesterification of BnzOH with Me-4-O-MeGlcA by 6.5  $\mu\text{g/mL}$  (0.11  $\mu\text{M}$ ) CuGE over 100 min. EIC of Me-4-O-MeGlcA (black) at a retention time (RT) 6.5 min and  $m/z$  244.96 decreased intensity over reaction time. Bnz-4-O-MeGlcA (green) at a RT 9.8 min and  $m/z$  321.08 increased intensity over reaction time. All ions are shown as  $[\text{M}+\text{Na}]^+$ . MS2 spectra of  $m/z$  244.96 and  $m/z$  321.08 are also shown.

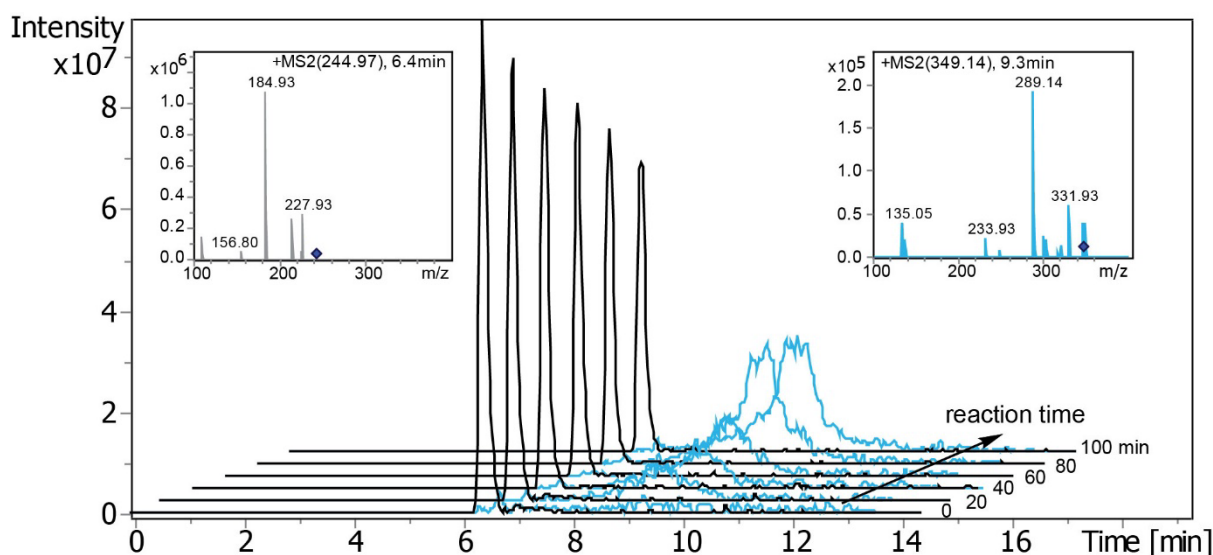

**Figure S4.** Reaction progression of the transesterification of PhPrOH with Me-4-O-MeGlcA by 1.3  $\mu\text{g/mL}$  (0.02  $\mu\text{M}$ ) CuGE over 100 min. EIC of Me-4-O-MeGlcA (black) at a retention time (RT) 6.4 min and  $m/z$  244.97 decreased intensity over reaction time. PhPr-4-O-MeGlcA (blue) at a RT 9.3 min and  $m/z$  349.14 increased intensity over reaction time. All ions are shown as  $[\text{M}+\text{Na}]^+$ . MS2 spectra of  $m/z$  244.97 and  $m/z$  349.14 are also shown.

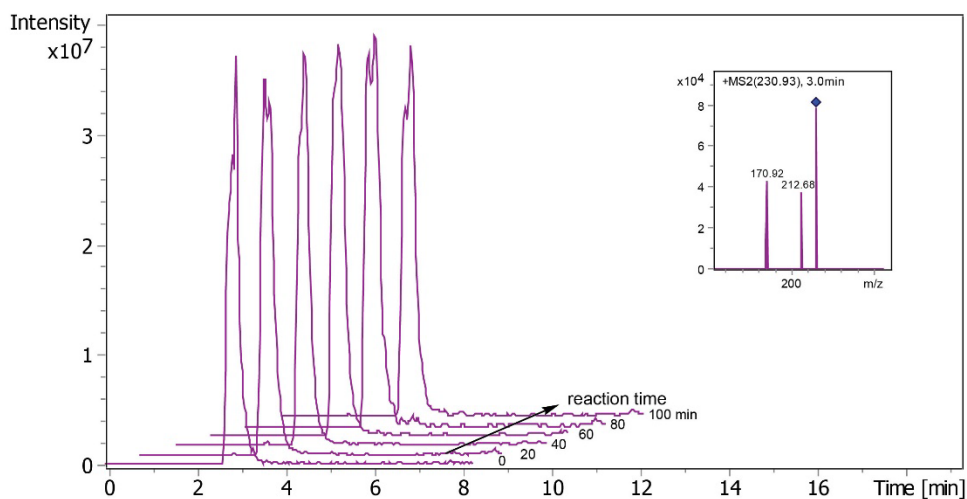

**Figure S5. Control reaction with BnzOH and Me-GlcA** where *Cu*GE loading was substituted with 10 mM Na acetate buffer pH 6 over 100 min. Extracted Ion Chromatogram (EIC) of Me-GlcA (violet) at a retention time (RT) 3.0 min and *m/z* 230.91 remained constant in intensity over reaction time. Ion is shown as  $[M+Na]^+$ . MS2 spectrum of *m/z* 230.91 is also shown.

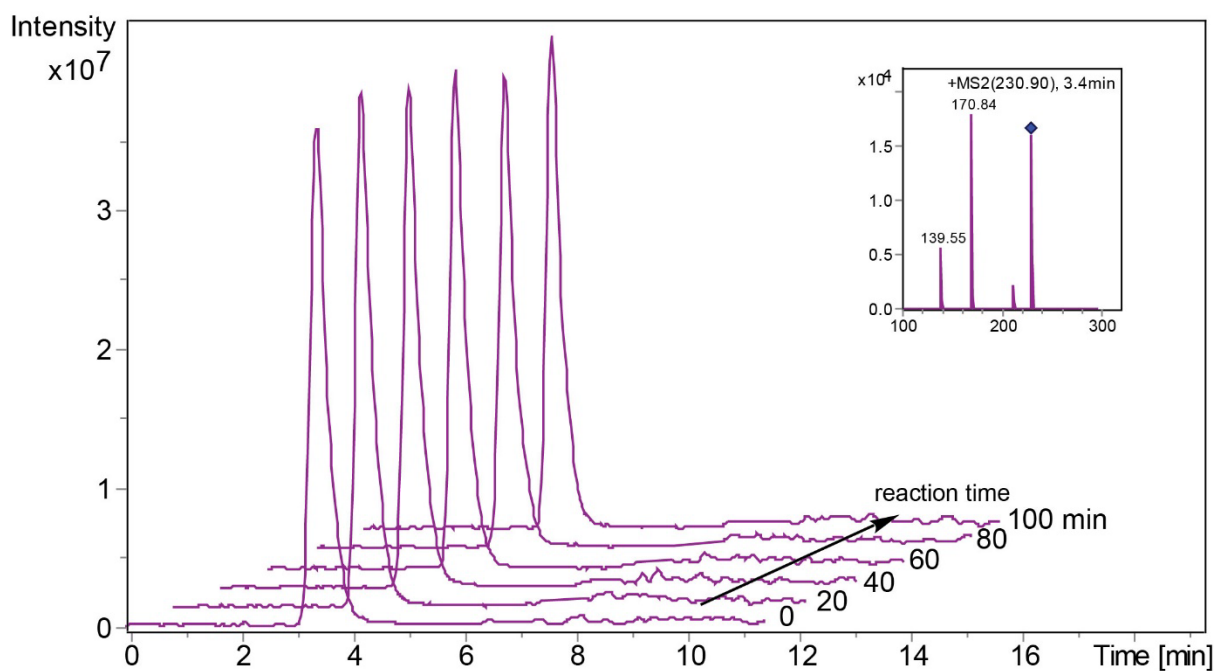

**Figure S6. Control reaction with PhPrOH and Me-GlcA** where *Cu*GE loading was substituted with 10 mM Na acetate buffer pH 6 over 100 min. Extracted Ion Chromatogram (EIC) of Me-GlcA (violet) at a retention time (RT) 3.4 min and *m/z* 230.90 remained constant in intensity over reaction time. Ion is shown as  $[M+Na]^+$ . MS2 spectrum of *m/z* 230.90 is also shown.

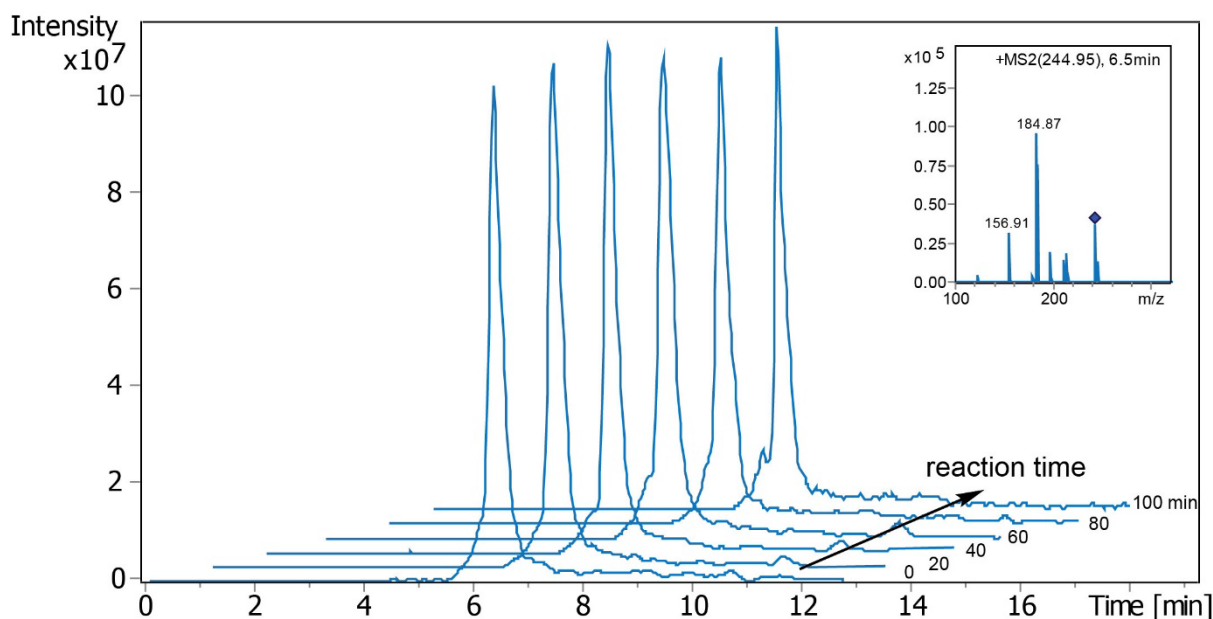

**Figure S7. Control reaction with BzOH and Me-4-O-MeGlcA** where CuGE loading was substituted with 10 mM Na acetate buffer pH 6 over 100 min. Extracted Ion Chromatogram (EIC) of Me-4-O-MeGlcA (blue) at a retention time (RT) 6.5 min and  $m/z$  244.95 remained constant in intensity over reaction time. Ion is shown as  $[M+Na]^+$ . MS2 spectrum of  $m/z$  244.95 is also shown.

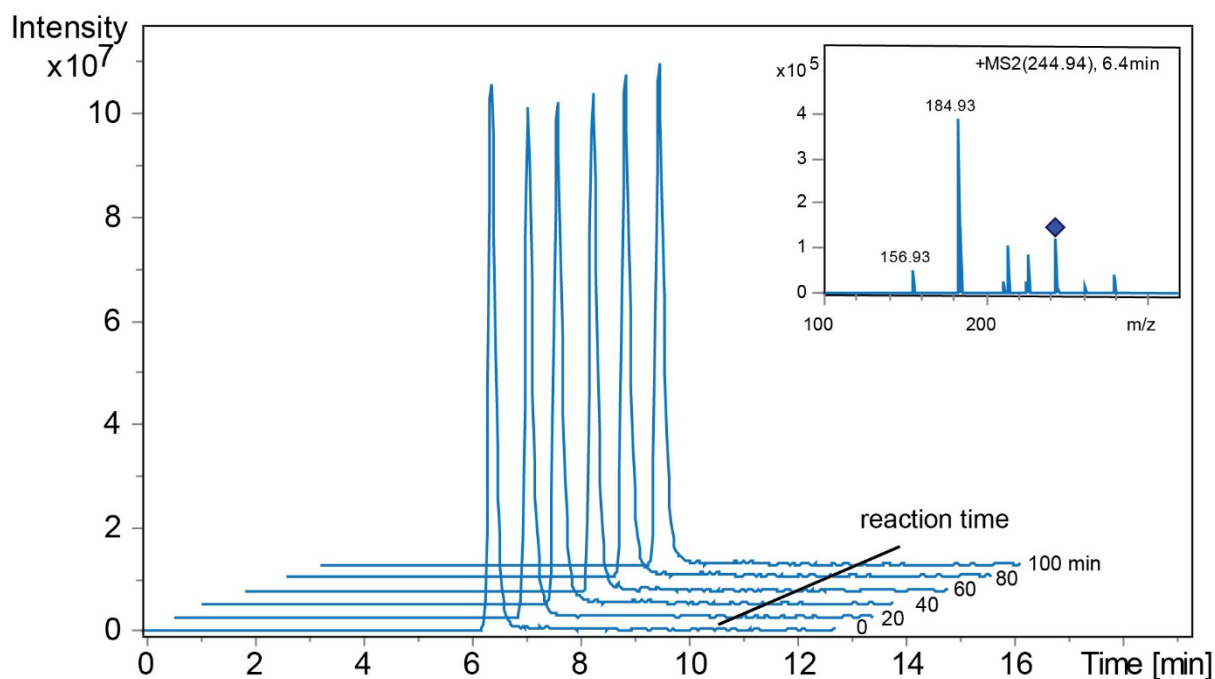

**Figure S8. Control reaction with PhPrOH and Me-4-O-MeGlcA** where CuGE loading was substituted with 10 mM Na acetate buffer pH 6 over 100 min. Extracted Ion Chromatogram (EIC) of Me-4-O-MeGlcA (blue) at a retention time (RT) 6.4 min and  $m/z$  244.94 remained constant in intensity over reaction time. Ion is shown as  $[M+Na]^+$ . MS2 spectrum of  $m/z$  244.95 is also shown.

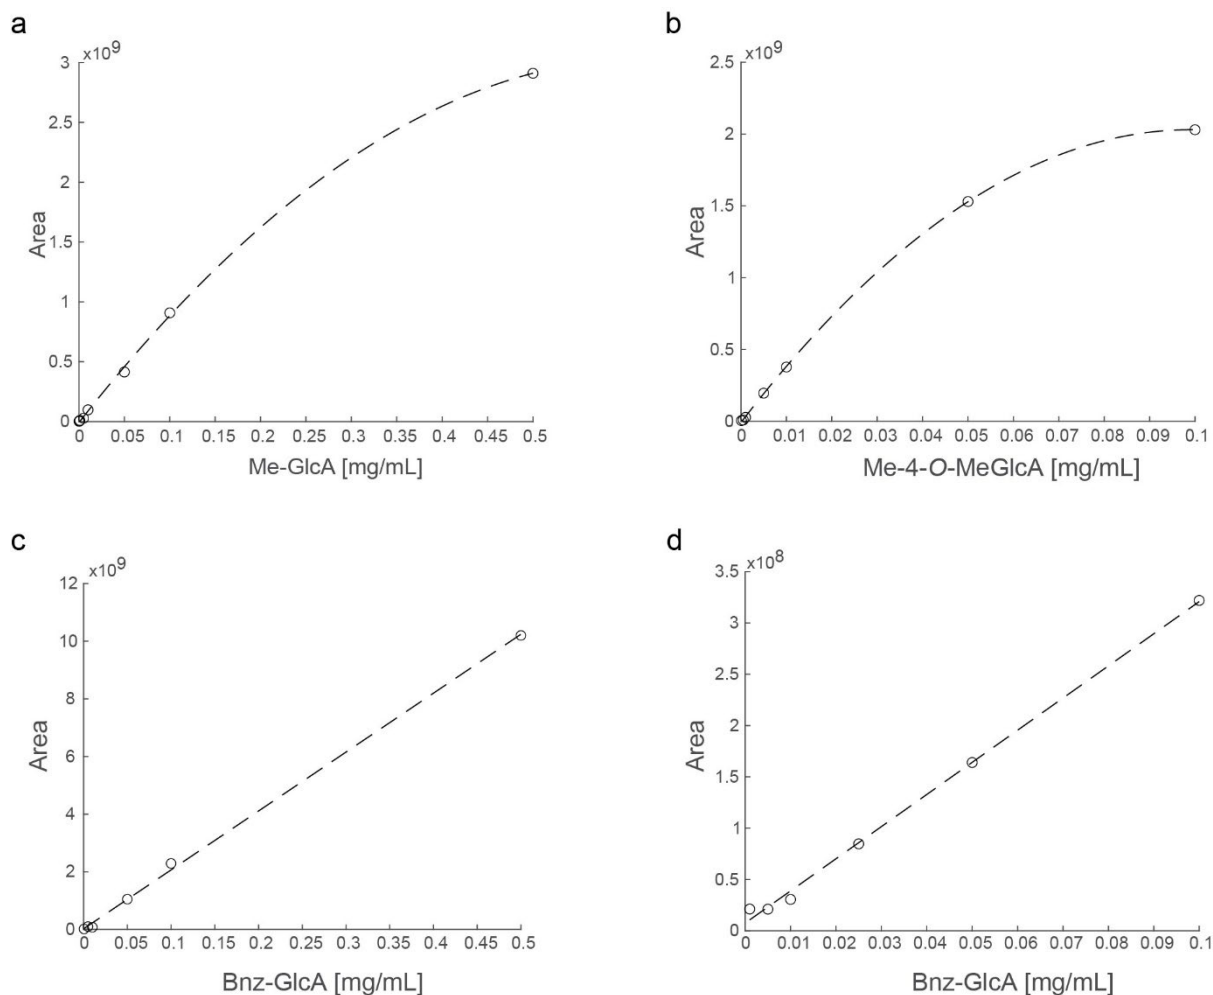

**Figure S9. Calibration curves.** a) Calibration curve used for Me-GlcA hydrolysis by *CuGE* determined as the area below the EIC of  $m/z$  230.92 and  $m/z$  439.07 at different MeGlcA concentrations. b) Calibration curve used for Me-4-*O*-MeGlcA hydrolysis by *CuGE* determined as the area below the EIC of  $m/z$  244.95 and  $m/z$  467.03 at different Me-4-*O*-MeGlcA concentrations. c) Calibration curve used for transesterification products of BnzOH with Me-4-*O*-MeGlcA and Me-GlcA. Quantification is performed relative to the concentration of BnzGlcA (dissolved in BnzOH, as the area below the EIC of  $m/z$  307.04 and  $m/z$  591.01). d) Calibration curve used for transesterification of PhPrOH with Me-4-*O*-MeGlcA and Me-GlcA. Quantification is performed relative to the concentration of Bnz-GlcA (dissolved in PhPrOH, area below the EIC of  $m/z$  307.04 and  $m/z$  591.01). All calibrations are performed in triplicate.

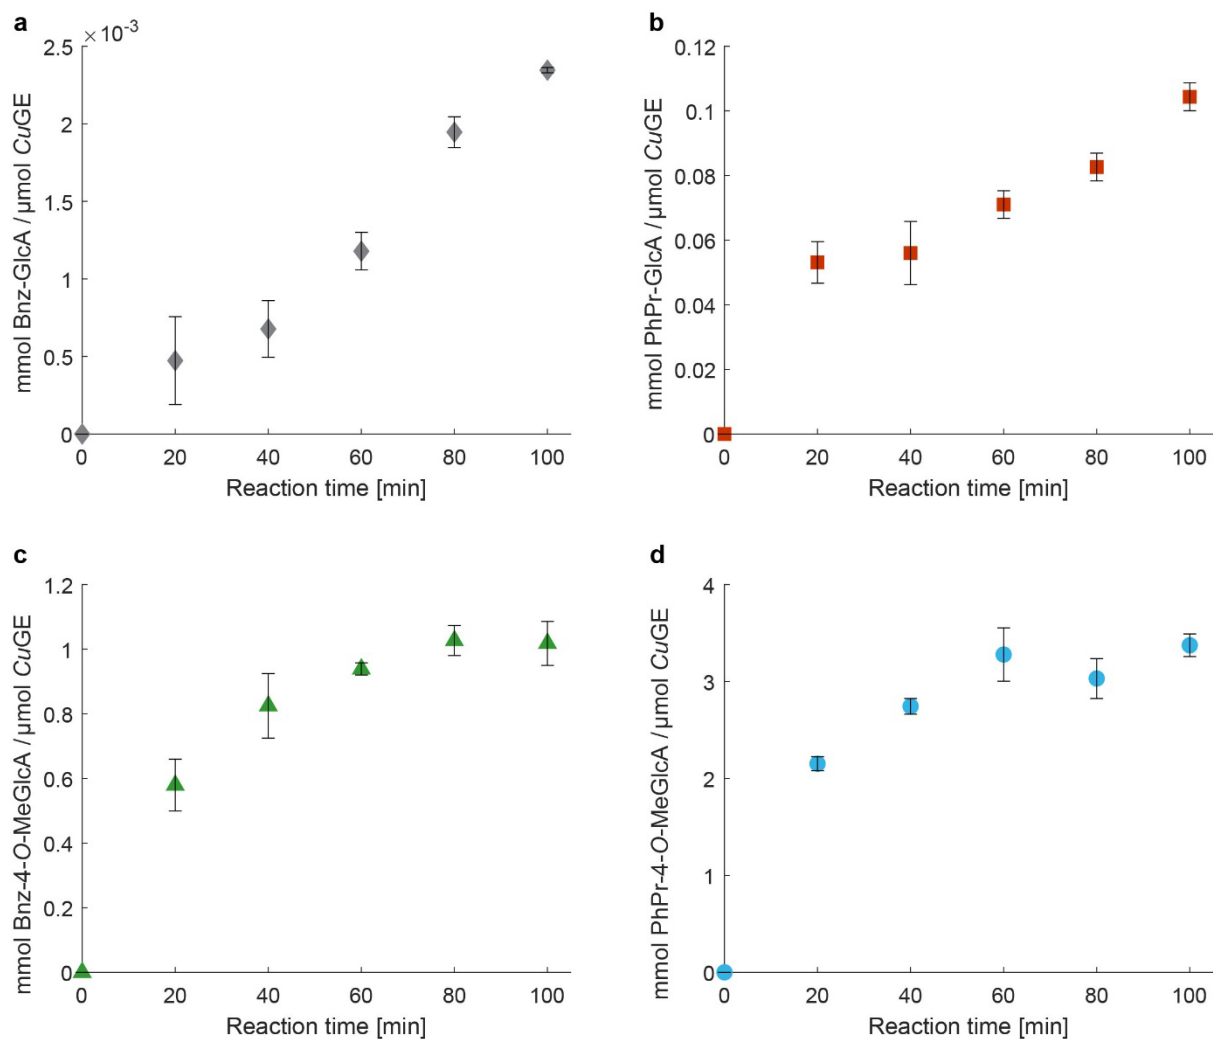

**Figure S10. Comparison between the product formations during transesterification reactions by *CuGE*.** a) Product formation of the ester-product Bnz-GlcA (grey diamonds) from the transesterification of BnzOH with Me-GlcA expressed as product formation (mmol Bnz-GlcA/ $\mu\text{mol CuGE}$ ) using 260  $\mu\text{g/mL}$  (4.3  $\mu\text{M}$ ) of *CuGE*. b) Product formation of the ester-product PhPr-GlcA (red squares) from the transesterification of PhPrOH with Me-GlcA using 52  $\mu\text{g/mL}$  (0.87  $\mu\text{M}$ ) of *CuGE*. c) Product formation of the ester-product Bnz-4-*O*-MeGlcA (grey diamonds) from the transesterification of BnzOH with Me-4-*O*-MeGlcA using 6.5  $\mu\text{g/mL}$  (0.11  $\mu\text{M}$ ) of *CuGE*. d) Product formation of the ester-product PhPr-4-*O*-MeGlcA (light blue circles) from the transesterification of PhPrOH with Me-4-*O*-MeGlcA using 1.3  $\mu\text{g/mL}$  (0.02  $\mu\text{M}$ ) of *CuGE*. Standard deviations of triplicate reactions are shown. The reaction evolution cannot be compared directly, as they are showed with their respective y-axis.
